# Supplementary material for: MGMT methylation pattern of long-term and short-term survivors of glioblastoma reveals CpGs of the enhancer region to be of high prognostic value
Source: Springer Nature journal article supplement (doi:10.1186/s40478-023-01622-w), 2023-08-28

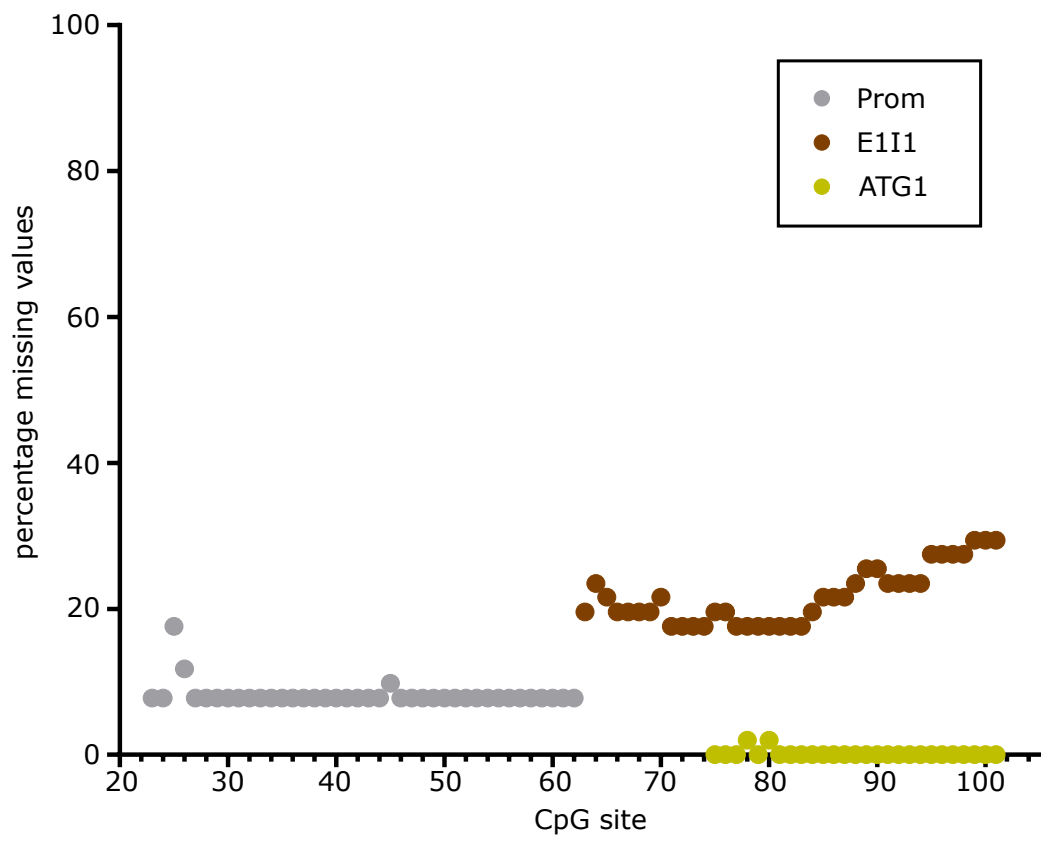

Supplement: MOESM2 [file 25971318]
